## Erratum

Vol. 53, no. 2, April 1996 Pages 329–334

Fisheries and Plankton Acoustics, ICES Marine Science Symposia Vol. 202

Application of dual-beam and split-beam target tracking in fisheries acoustics

J. E. Ehrenberg and T. T. Torkelson

The authors regret that the following mistakes were made:

Page 330, Figure 1.

The dB values on the x axis of Figure 1, parts (a) and (b), should be moved 5 dB to the left. The scale should therefore start at  $-10$  dB and end at  $-45$  dB, with no change in position of the bars representing relative frequency.

Page 330, paragraph 2.

Sentence two should read:

The data were collected using a fixed-location, side-looking 200 kHz split-beam acoustic system operating on the Kenai River, Alaska during the 1994 summer chinook salmon (*Oncorhynchus tshawytscha*) migration.

Page 333, top of page.

Sentence two should read:

This figure shows the distribution of vertical beam angles of upstream and downstream fish (primarily chum salmon, *O. keta*) as they . . .

Sentence four should read:

About 4% of the tracked targets at this location. . .

Page 333, paragraph 1.

Sentence two should read:

The speed is determined by first using the angular estimates to determine the three-dimensional distances travelled between successive echoes.

Sentence three should read:

The speed is determined by dividing the total distance travelled by the time in the beam.

Page 333, Acknowledgements.

This section should read:

The authors wish to thank the following agencies and individuals for allowing us to include example data sets from their ongoing fish monitoring projects: Debby Burwen, Alaska Dept of Fish and Game, AK (Kenai River data example), Dave Daum and Bruce Osborne of US Fish and Wildlife Service, AK (Chandalar River data example).
